# Supplementary material for: The gut microbiome modulates the transformation of microglial subtypes
Source: PubMed Central journal article supplement (PMC10208978; doi:10.1038/s41380-023-02017-y), 2023-03-13

# Sup Figure 1

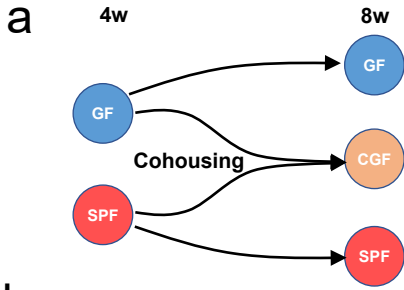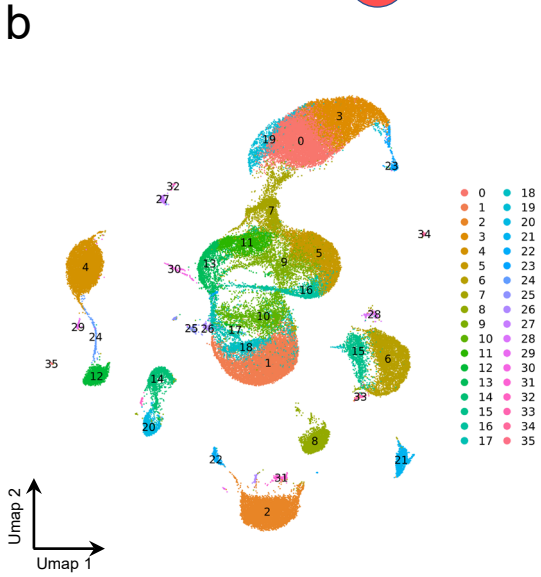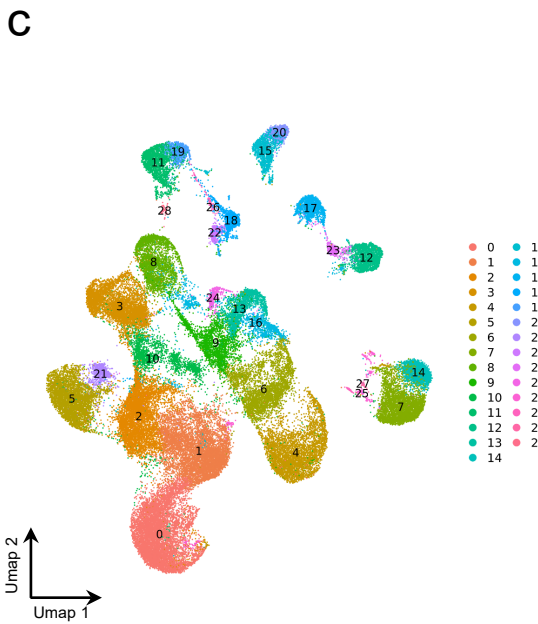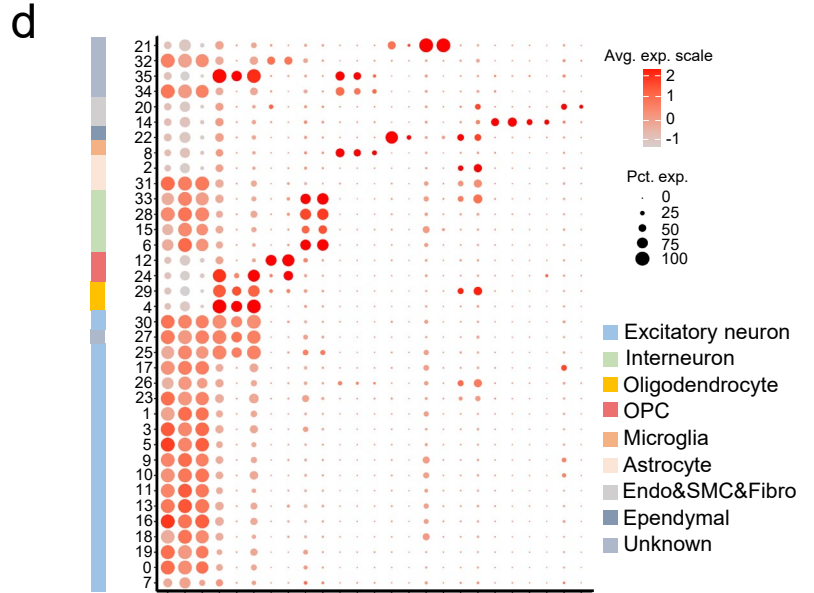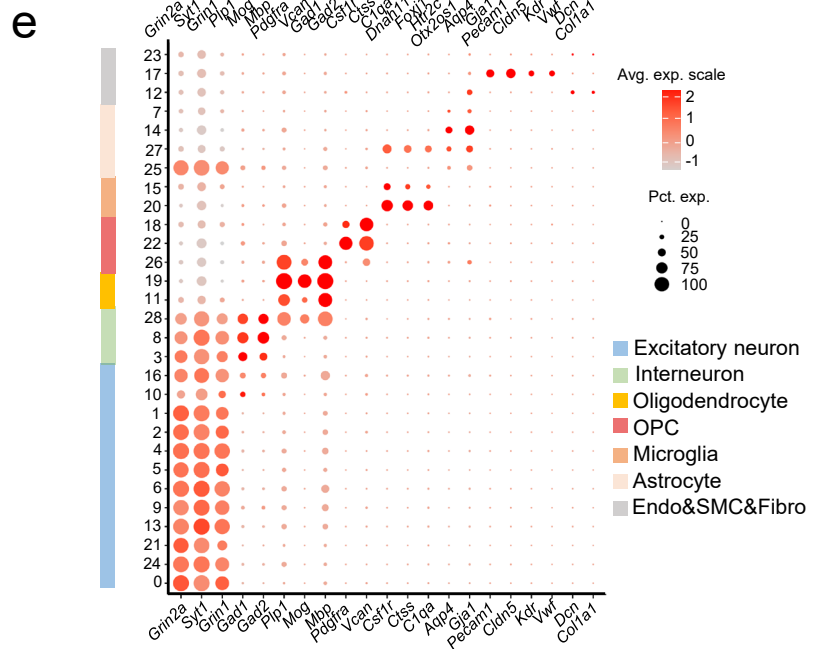

# Sup Figure 2

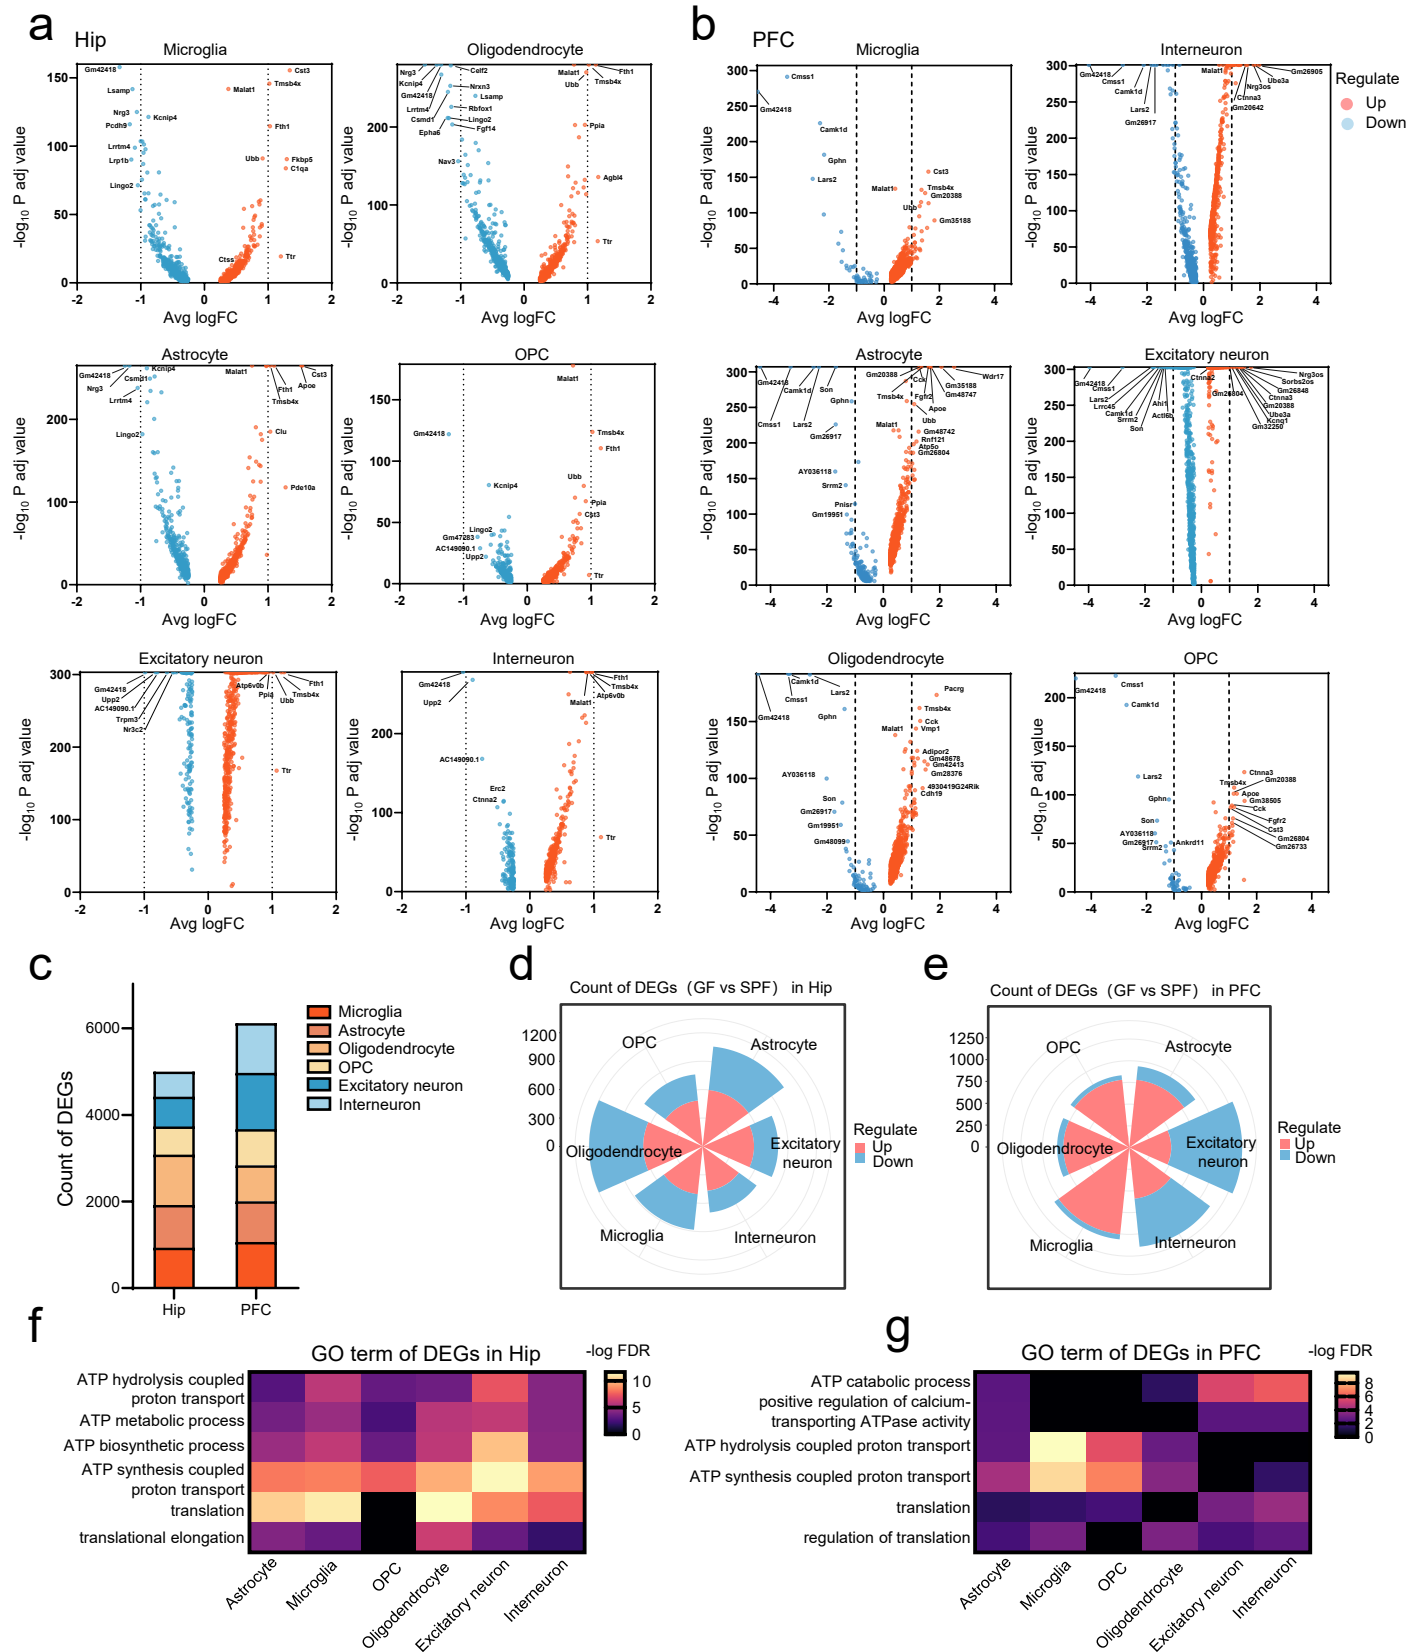

# Sup Figure 3

a

Canonical pathway enriched in Hip

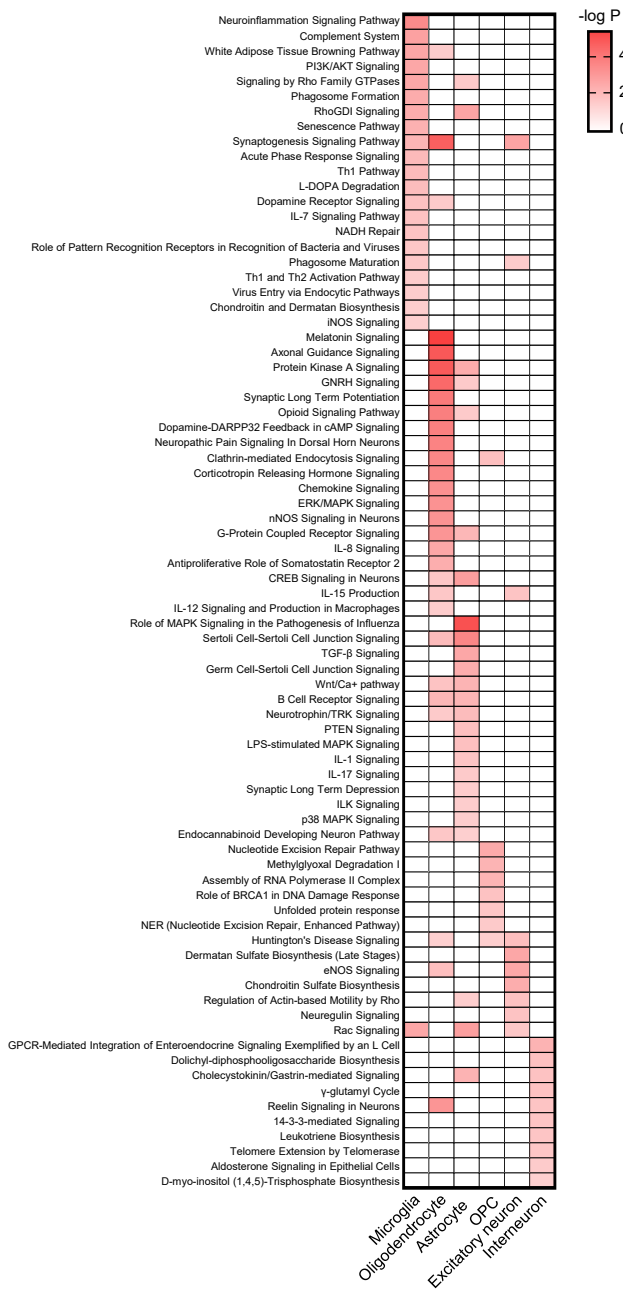

b

Canonical pathway enriched in PFC

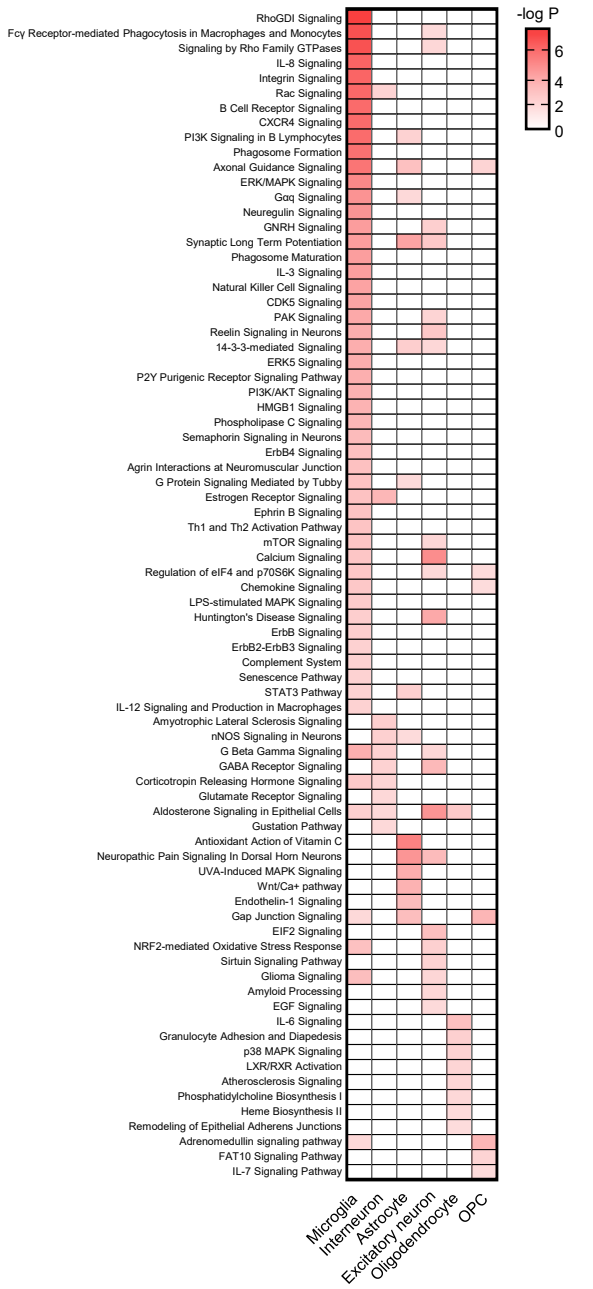

# Sup Figure 4

a

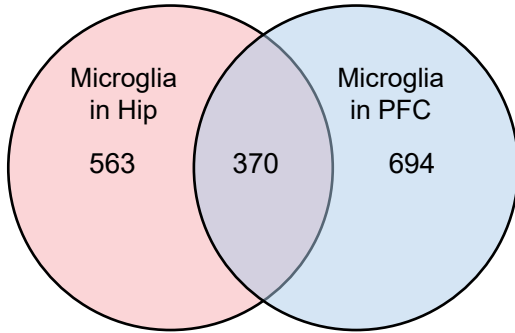

b

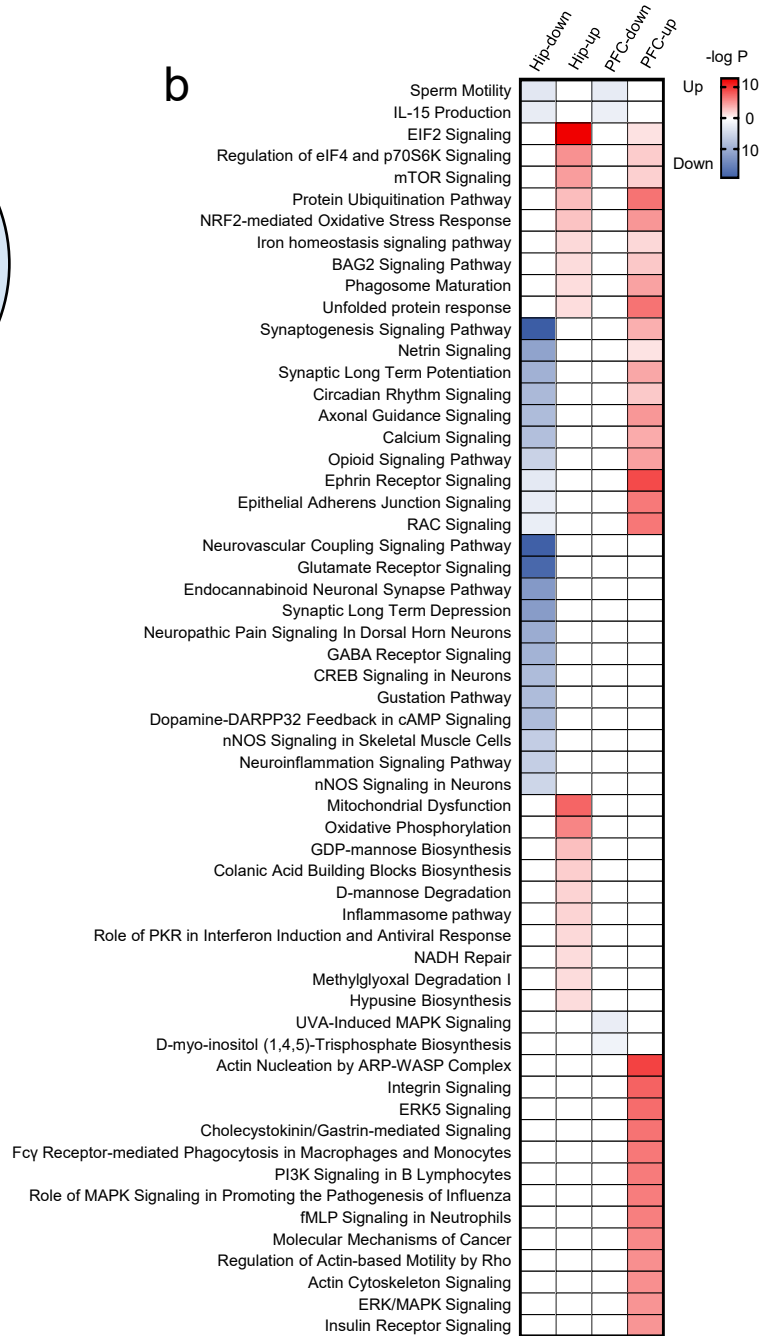

# Sup Figure 5

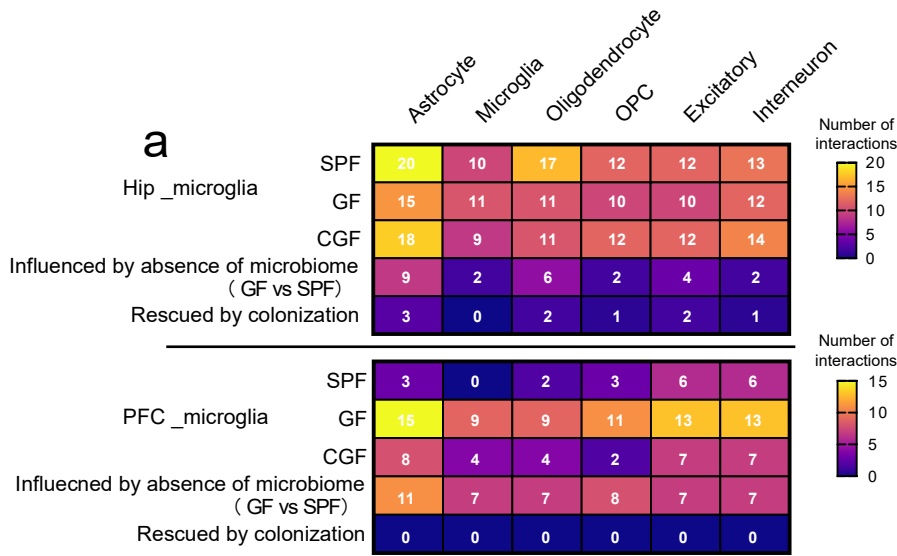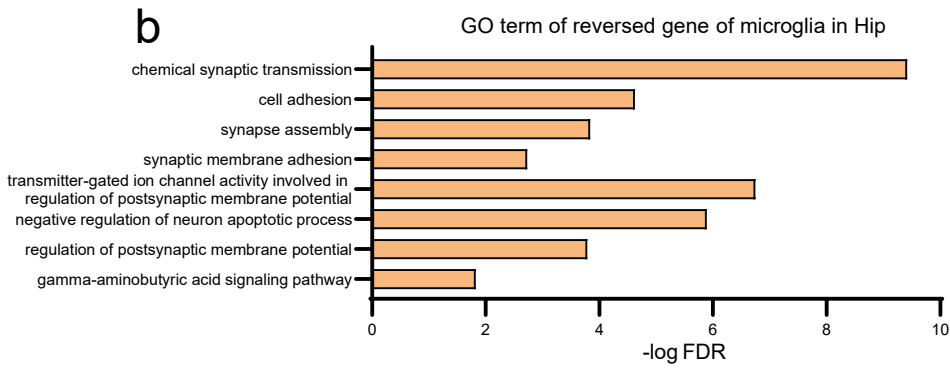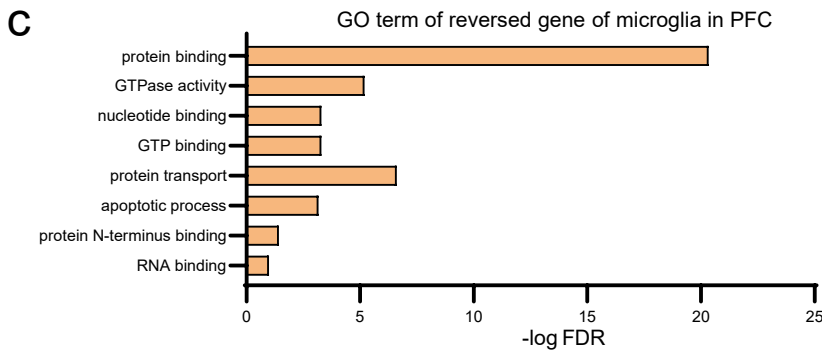

# Sup Figure 6

**a**

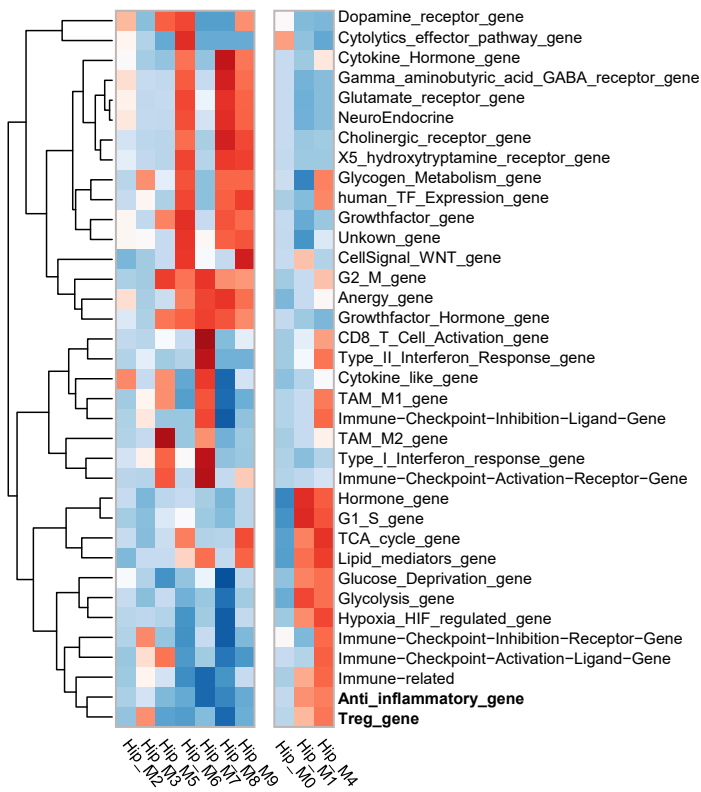

**b**

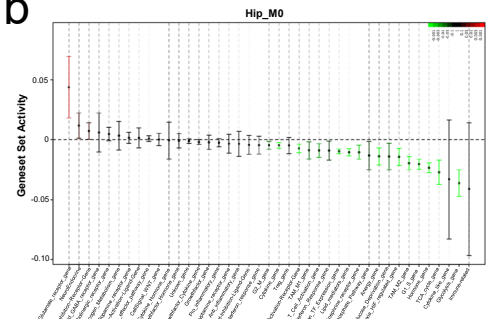

**c**

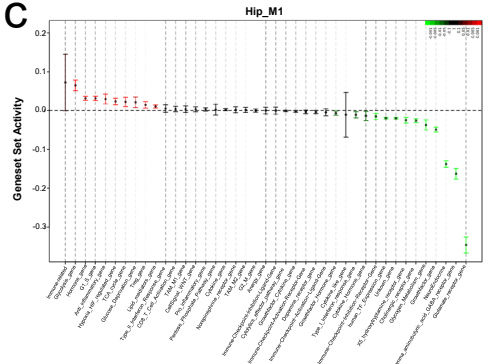

**d**

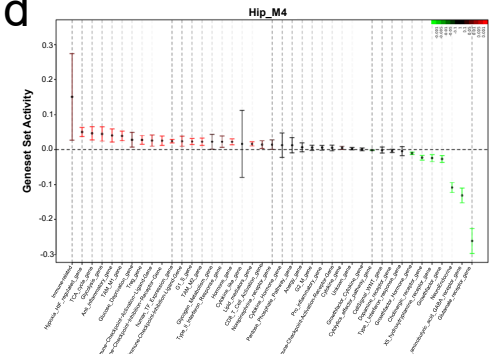

**e**

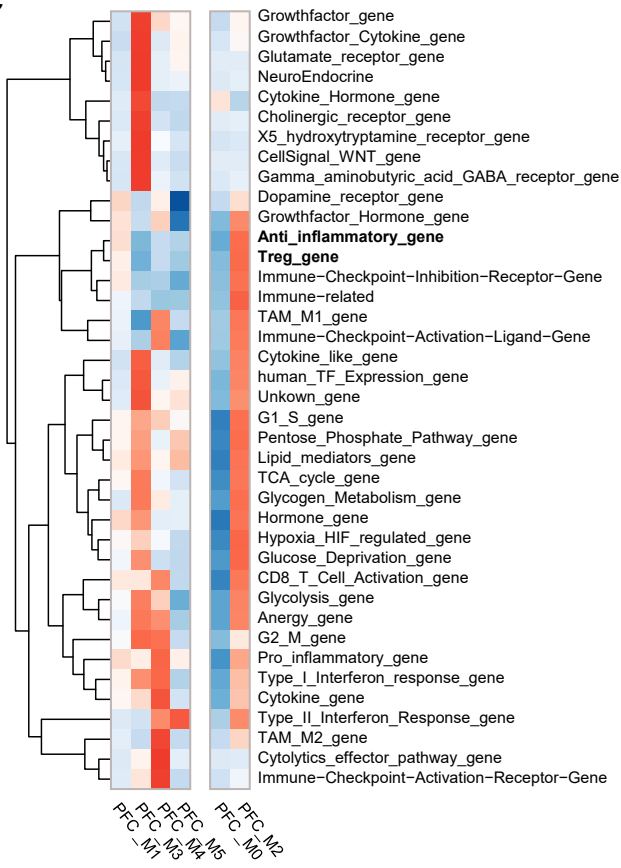

**f**

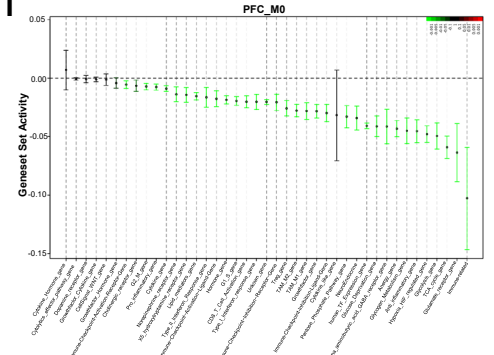

**g**

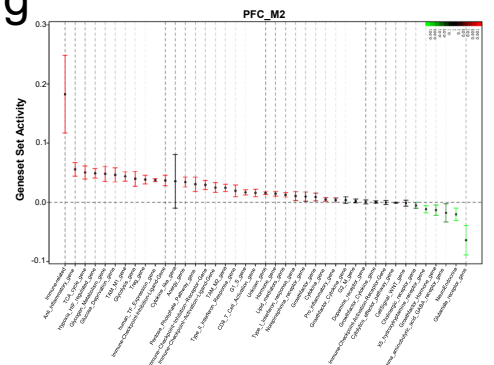

# Sup Figure 7

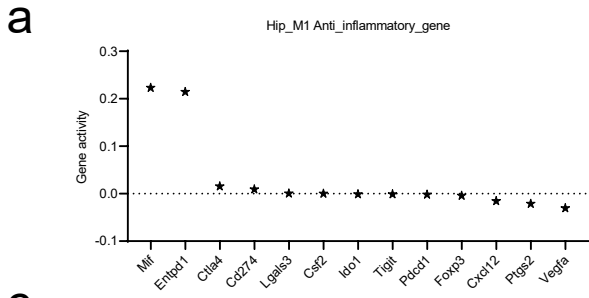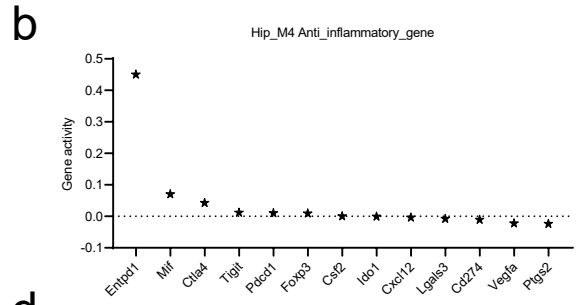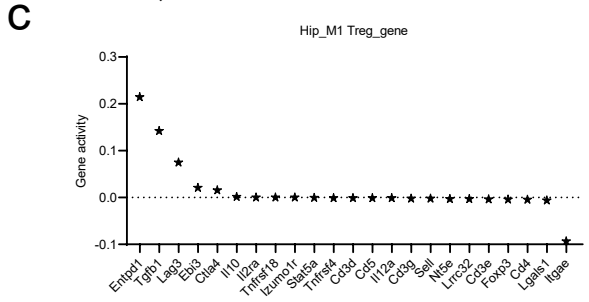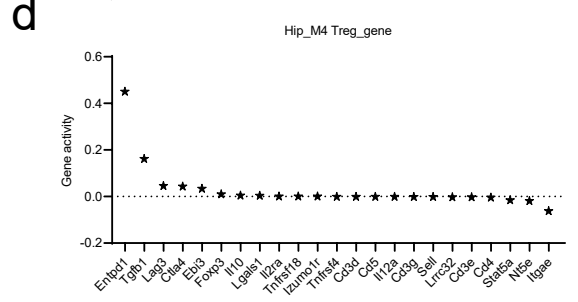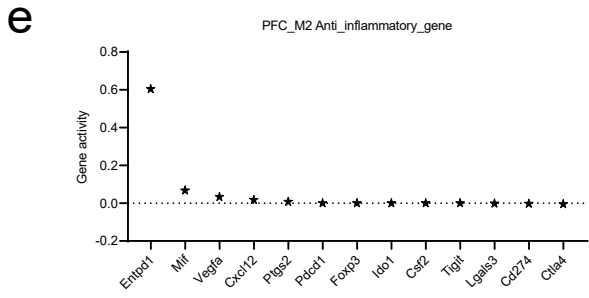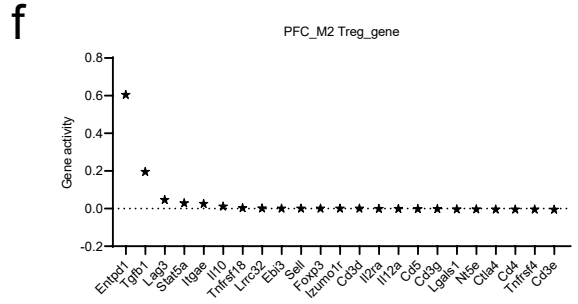

# Sup Figure 8

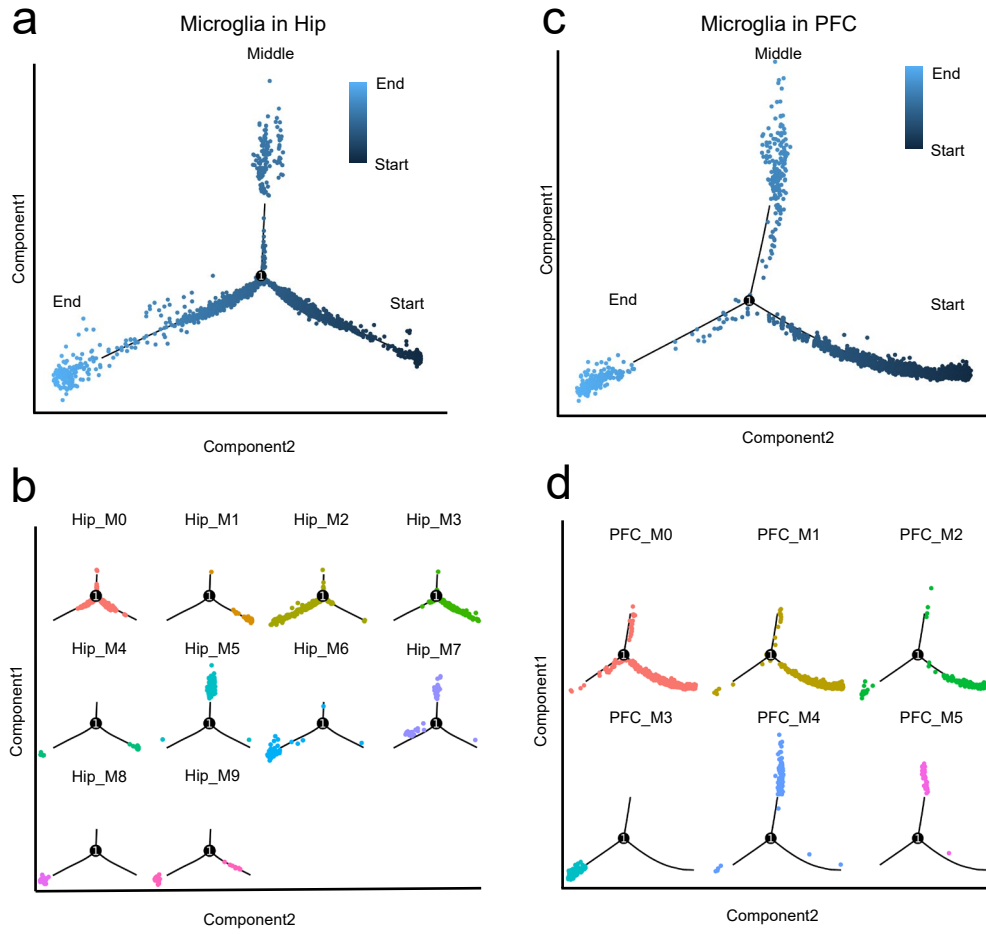



# Sup Figure 9

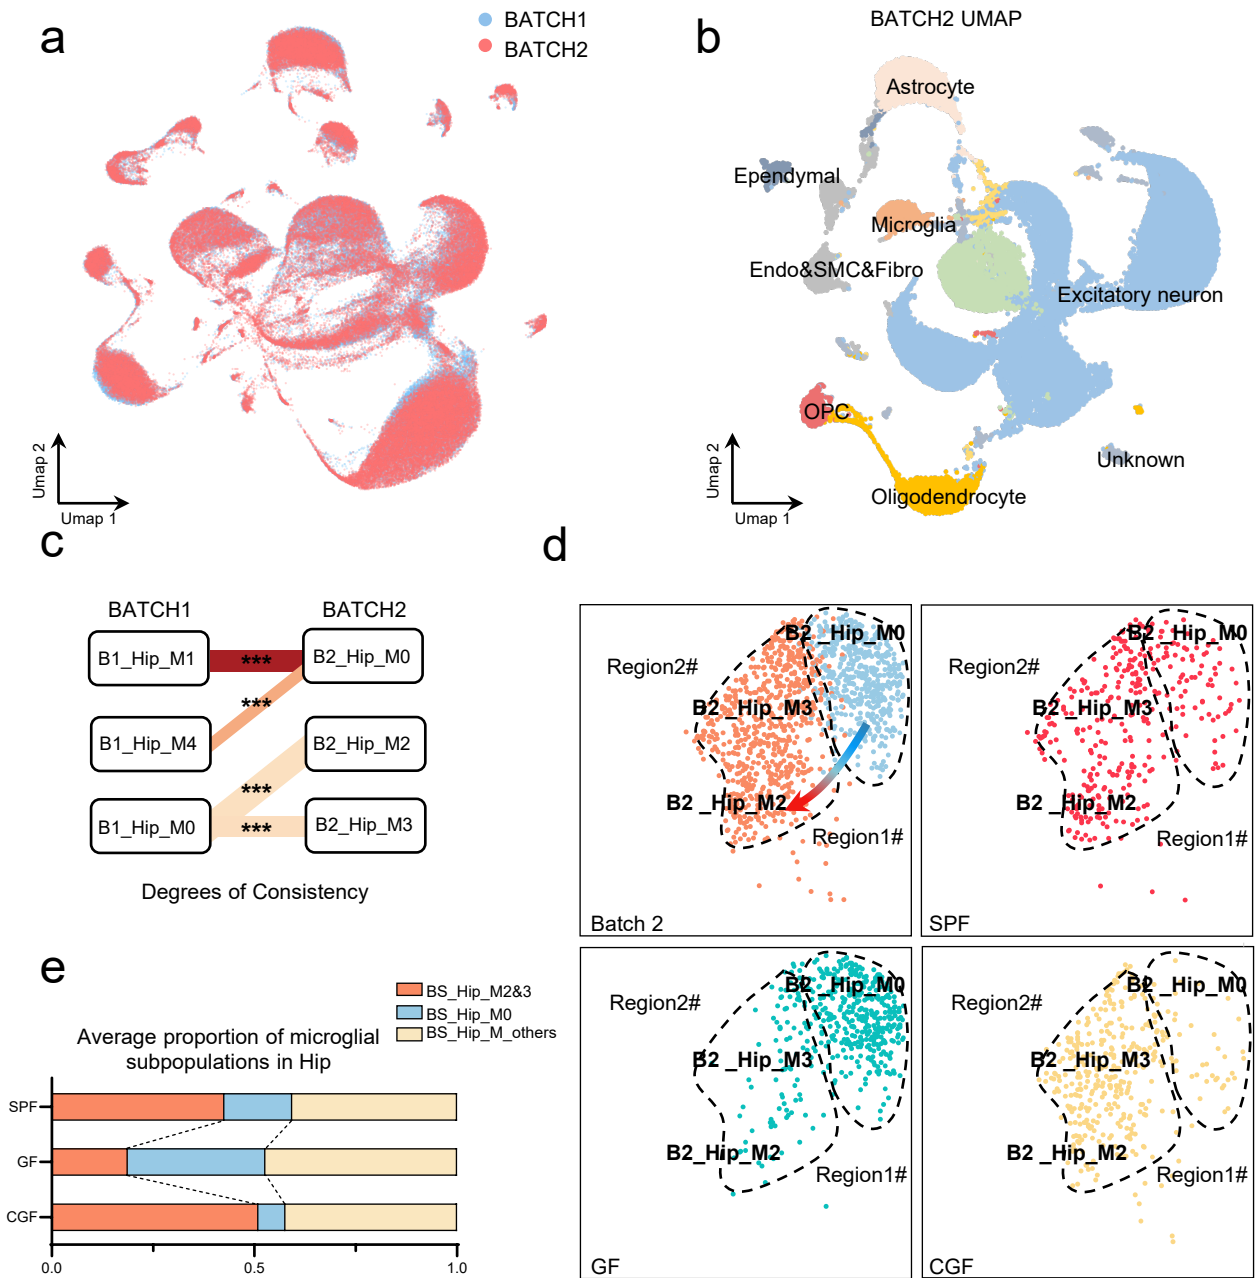

# Sup Figure 10

**a**

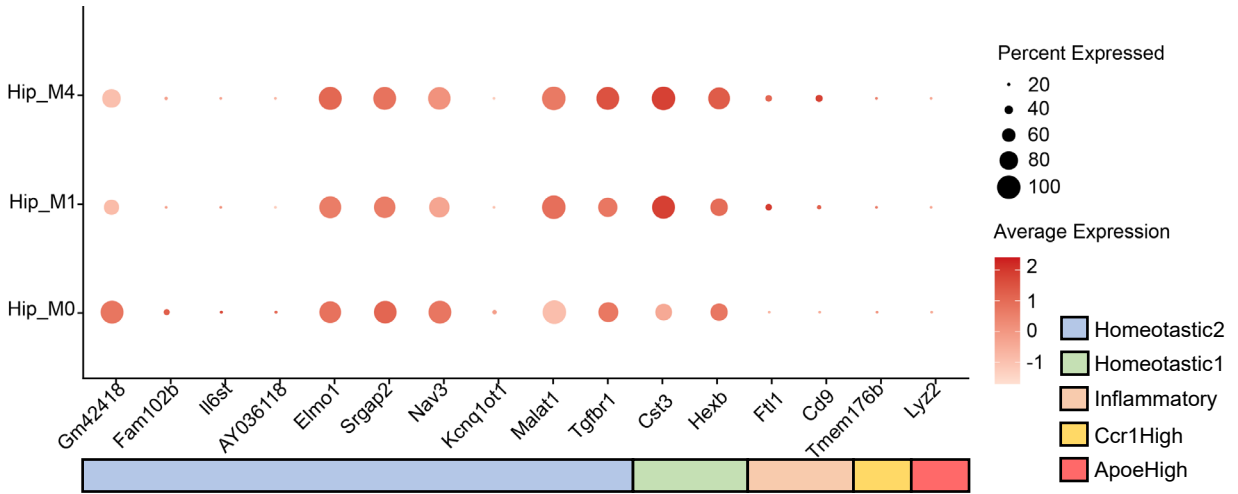

**b**

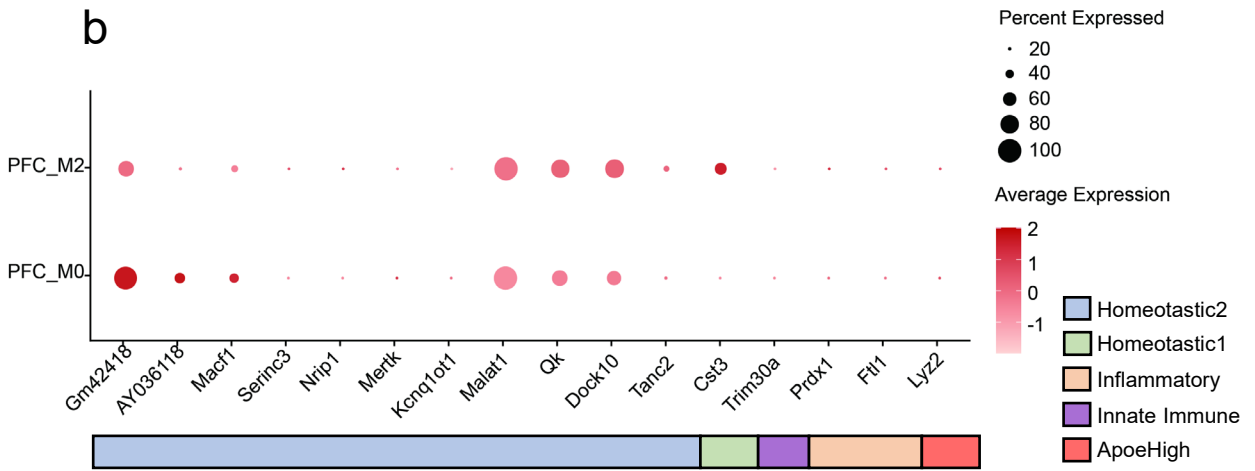

Supplement: 41380_2023_2017_MOESM2_ESM.pdf [file 41380_2023_2017_MOESM2_ESM.pdf]
